# Supplementary material for: Constructing atomic layer g-C3N4–CdS nanoheterojunctions with efficiently enhanced visible light photocatalytic activity
Source: Royal Society of Chemistry journal article supplement (doi:10.1039/c4cp02846e), 2014-01-01
Supplement: c4cp02846e1.pdf [file c4cp02846e1.pdf]

## Constructing atomic layer g-C<sub>3</sub>N<sub>4</sub>/CdS nanoheterojunction with efficiently enhanced visible light photocatalytic activity

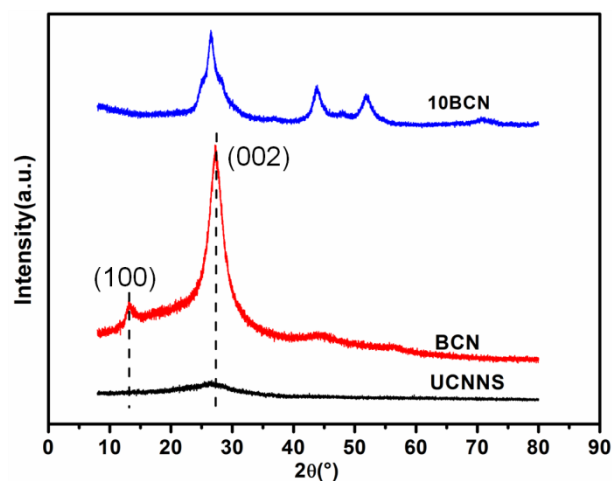

Figure S1. XRD patterns of BCN, UCNNS, and Bulk 10CN

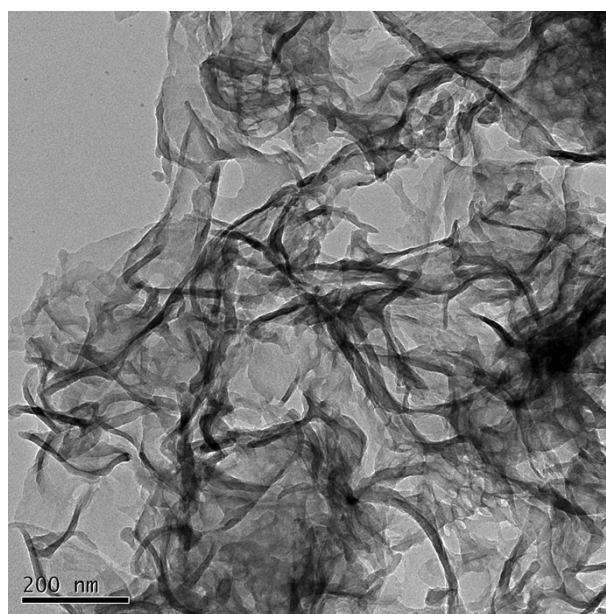

Figure S2. TEM image of UCNNS

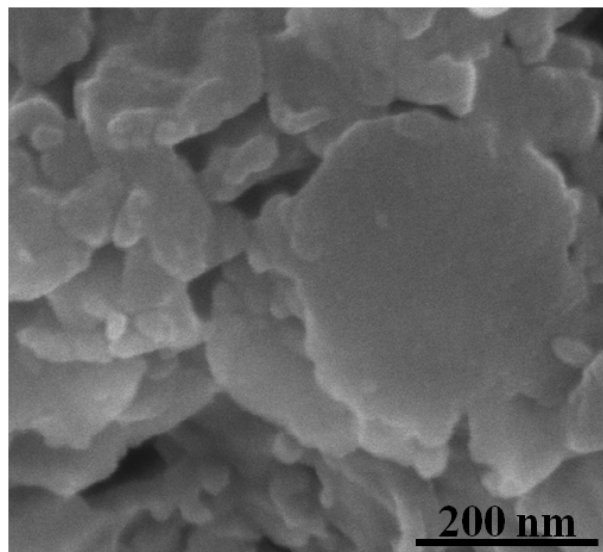

**Figure S3.** SEM image of bulk g-C<sub>3</sub>N<sub>4</sub> (BCN)

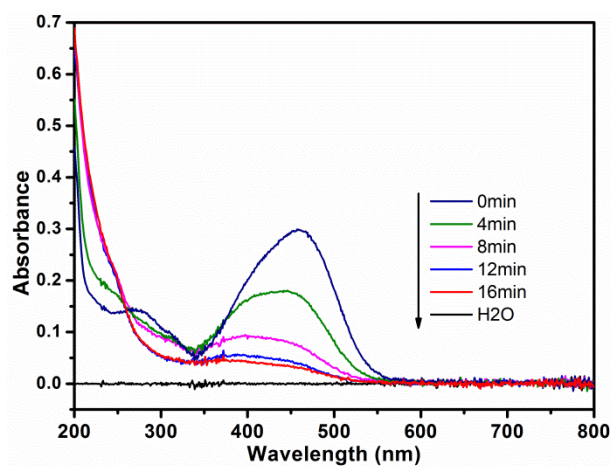

**Figure S4.** Temporal UV-visible absorption spectral changes for the MO solution (5 mg/L) with 10CN sample under visible light irradiation ( $\lambda \geq 420$  nm)

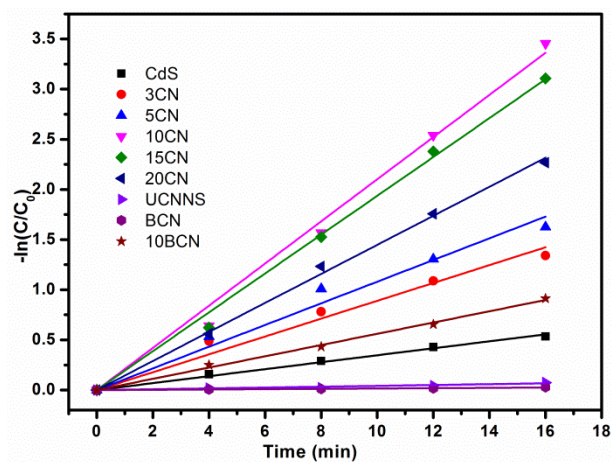

**Figure S5.** The photodegrade rate of MO using pseudo-first-order reaction kinetics

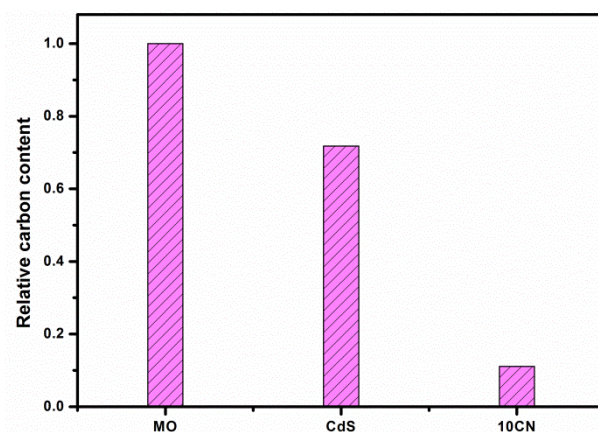

**Figure S6.** The TOC for CdS and 10CN sample after visible light irradiation

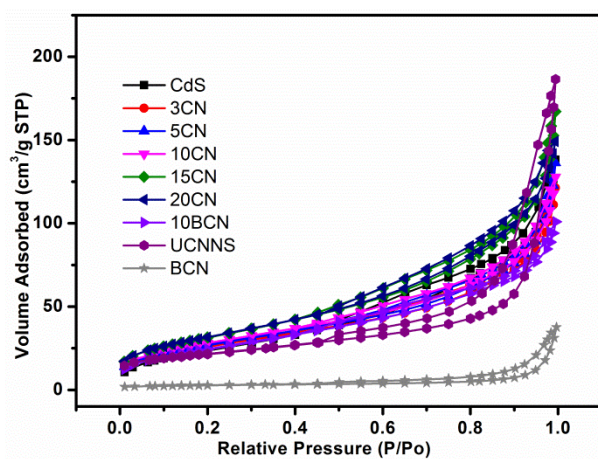

**Figure S7.** Nitrogen adsorption-desorption isotherms for as-prepared samples.

**Table S1.** The physical properties of the samples

| Sample                                     | CdS  | 3CN  | 5CN   | 10 CN | 15 CN | 20 CN | UCN NS | BCN  | 10 BCN |
|--------------------------------------------|------|------|-------|-------|-------|-------|--------|------|--------|
| $S_{\text{BET}}$ ( $\text{m}^2/\text{g}$ ) | 91.3 | 97.1 | 101.0 | 104.3 | 116.6 | 116.0 | 76.5   | 9.4  | 91.9   |
| Pore volume ( $\text{cm}^3/\text{g}$ )     | 0.21 | 0.19 | 0.21  | 0.26  | 0.22  | 0.23  | 0.29   | 0.06 | 0.16   |

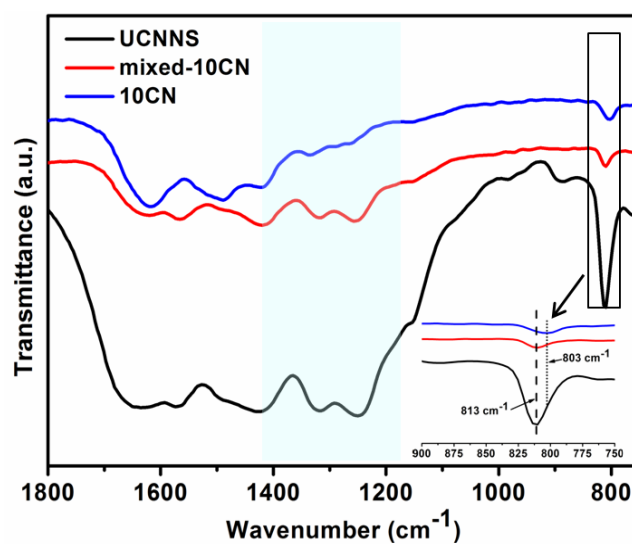

**Figure S8.** Comparison of FTIR spectra for UCNNS, mixed-10CN, and 10CN.

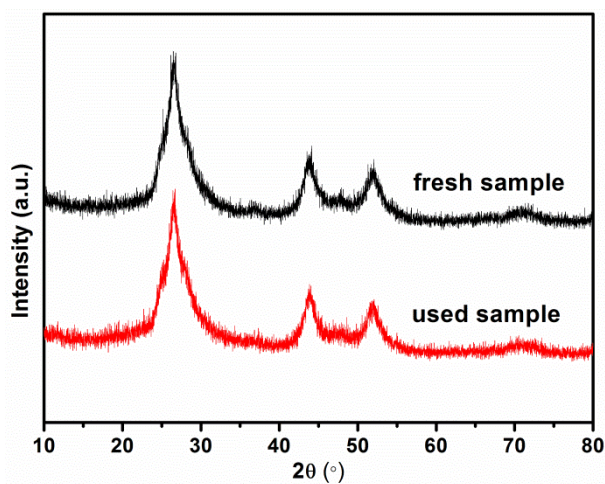

**Figure S9.** XRD patterns of as-prepared 10CN sample and the sample after it was used in cycling photocatalytic degradation test.

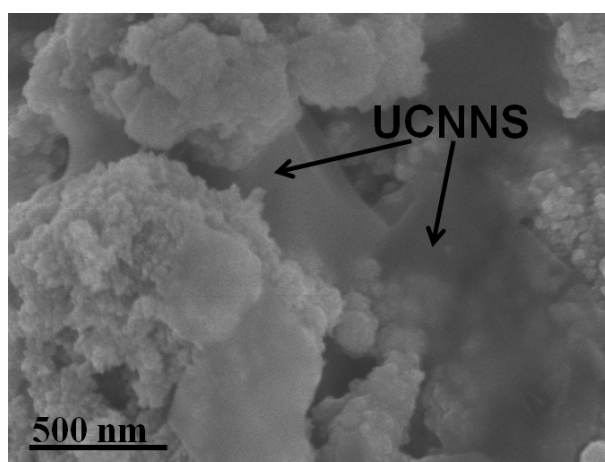

**Figure S10.** SEM of as-prepared 10CN sample after it was used in cycling photocatalytic degradation test.



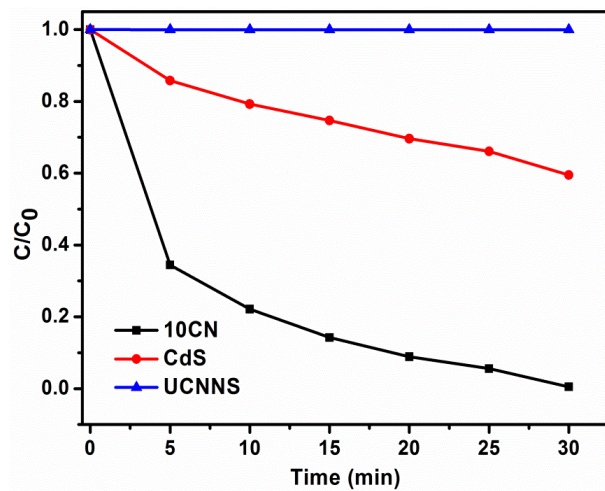

**Figure S11.** Photocatalytic degradation of MO over the 10CN, CdS, and UCNNS samples under visible light with a band-selective filter ( $450 \pm 15$  nm).

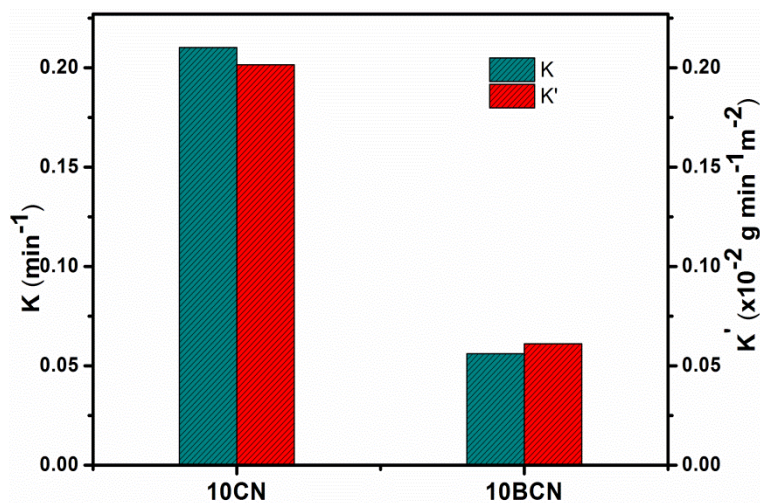

**Figure S12.** The comparison of reaction rate constants for photocatalytic degradation of MO over samples over 10CN and 10BCN before and after normalization with surface area.
